# Supplementary material
Source: publisher figshare collection journal article supplement (https://asha.figshare.com/ndownloader/files/31694705)
Supplement: Supplementary file 1 [file 31694705]

**Supplemental Material S1.** Description of typical listening tasks used to assess spoken language processing in children and classification into SPADE dimensions.

| <b>Speech perception</b>                                                                                                                                                                     |                                                                                                                                                                                                                                                                                                                                            |
|----------------------------------------------------------------------------------------------------------------------------------------------------------------------------------------------|--------------------------------------------------------------------------------------------------------------------------------------------------------------------------------------------------------------------------------------------------------------------------------------------------------------------------------------------|
| Task type                                                                                                                                                                                    | Task description                                                                                                                                                                                                                                                                                                                           |
| Phonologic discrimination<br>(Klatte et al., 2007; Morsomme et al., 2011; Nakeva von Mentzer et al., 2018)                                                                                   | Children listen to similar sounding (non-) words and have to discriminate them.                                                                                                                                                                                                                                                            |
| Odd one out (Zhang et al., 2019)                                                                                                                                                             | Children listen to phonologically similar (non-) words and have to pick up on the odd word (e.g., <i>fan</i> , <i>fell</i> , <i>book</i> → <i>book</i> ).                                                                                                                                                                                  |
| Repetition of (non-)words<br>(Howard et al., 2010; McCreery & Stelmachowicz, 2013; Picou et al., 2019), or sentences (Crandell & Smaldino, 1996; Peng et al., 2016; Yacullo & Hawkins, 1987) | Children listen to (non-)words or sentences and have to repeat what they have heard. Picou et al. (2019) combined this task with a secondary (visual) task, thereby increasing working memory demands. Prodi, Visentin, Borella, et al., (2019) tested non-verbal repetition: children reconstructed sentences by combining written words. |
| Word-picture matching<br>(Bradley & Sato, 2008; Jamieson et al., 2004; Klatte et al., 2007; Nelson et al., 2005; Prodi, Visentin, Peretti, et al., 2019)                                     | Children listen to words and have to match them to corresponding pictures in <i>n</i> -alternative forced-choice designs.                                                                                                                                                                                                                  |
| Word-word matching (Peng & Jiang, 2016; Peng et al., 2016; Peng & Wu, 2018)                                                                                                                  | Children listen to words and have to match them to the corresponding written word in <i>n</i> -alternative forced-choice designs.                                                                                                                                                                                                          |

| <b>Listening comprehension</b>                                                                                                                                                                                            |                                                                                                                               |
|---------------------------------------------------------------------------------------------------------------------------------------------------------------------------------------------------------------------------|-------------------------------------------------------------------------------------------------------------------------------|
| Task type                                                                                                                                                                                                                 | Task description                                                                                                              |
| Acceptability/veracity judgments (Brännström, Kastberg, et al., 2018; Osman & Sullivan, 2014)                                                                                                                             | Children listen to sentences and have to judge their semantic acceptability or veracity.                                      |
| Sentence-picture matching<br>(Lyberg-Åhlander, Haake, et al., 2015; Lyberg-Åhlander, Holm, et al., 2015; Sahlén et al., 2017; Prodi, Visentin, Borella, et al., 2019)                                                     | Children listen to sentences and have to match them to corresponding pictures in <i>n</i> -alternative forced-choice designs. |
| Passage comprehension<br>(Brännström, von Lochow, et al., 2018; Chui & Ma, 2018; Morsomme et al., 2011; Morton & Watson, 2001; Nirme et al., 2019; Rogerson & Dodd, 2005; Sullivan et al., 2015; von Lochow et al., 2018) | Children listen to passages and have to answer questions (multiple-choice or open question) assessing their comprehension.    |
| Execution of oral instructions<br>(Klatte et al., 2007)                                                                                                                                                                   | Children listen to oral instructions and have to perform the respective actions.                                              |

### Auditory working memory

| Task type                                                                                                                                                               | Task description                                                                                                                  |
|-------------------------------------------------------------------------------------------------------------------------------------------------------------------------|-----------------------------------------------------------------------------------------------------------------------------------|
| Backward digit recall<br>(Osman & Sullivan, 2014; Sullivan et al., 2015)                                                                                                | Children listen to digits and have to recall the sequence in reversed order after a fixed time span.                              |
| Forward digit recall<br>(Osman & Sullivan, 2014)                                                                                                                        | Children listen to digits and have to recall the sequence in the correct order after a fixed time span.                           |
| Odd one out with retention interval<br>(Klatte et al., 2007)                                                                                                            | Children listen to phonologically similar (non-)words. After a fixed time span, they have to recall the position of the odd word. |
| Word recall<br>(Brännström, Kastberg, et al., 2018; Hurtig et al., 2016; McGarrigle et al., 2017; Morton & Watson, 2001; Osman & Sullivan, 2014; Sullivan et al., 2015) | Children listen to words presented in isolation, in sentences, or in passages and have to recall them after a fixed time span.    |

### References

- Bradley, J. S., & Sato, H. (2008). The intelligibility of speech in elementary school classrooms. *The Journal of the Acoustical Society of America*, 123(4), 2078–2086. <https://doi.org/10.1121/1.2839285>
- Brännström, K. J., Kastberg, T., von Lochow, H., Haake, M., Sahlén, B., & Lyberg-Åhlander, V. (2018). The influence of voice quality on sentence processing and recall performance in school-age children with normal hearing. *Speech, Language and Hearing*, 21(1), 1–9. <https://doi.org/10.1080/2050571X.2017.1309787>
- Brännström, K. J., von Lochow, H., Lyberg-Åhlander, V., & Sahlén, B. (2018). Immediate passage comprehension and encoding of information into long-term memory in children with normal hearing: The effect of voice quality and multitalker babble noise. *American Journal of Audiology*, 27(2), 231–237. [https://doi.org/10.1044/2018\\_AJA-17-0061](https://doi.org/10.1044/2018_AJA-17-0061)
- Chui, J. C. H., & Ma, E. P. M. (2018). The impact of dysphonic voices on children’s comprehension of spoken language. *Journal of Voice*, 33(5), 801.e7–801.e16. <https://doi.org/10.1016/j.jvoice.2018.03.004>
- Crandell, C. C., & Smaldino, J. J. (1996). Speech perception in noise by children for whom English is a second language. *American Journal of Audiology*, 5(3), 47–51. <https://doi.org/10.1044/1059-0889.0503.47>
- Howard, C. S., Munro, K. J., & Plack, C. J. (2010). Listening effort at signal-to-noise ratios that are typical of the school classroom. *International Journal of Audiology*, 49(12), 928–932. <https://doi.org/10.3109/14992027.2010.520036>
- Hurtig, A., van de Poll, M. K., Pekkola, E. P., Hygge, S., Ljung, R., & Sörqvist, P. (2016). Children’s recall of words spoken in their first and second language: Effects of signal-to-noise ratio and reverberation time. *Frontiers in Psychology*, 6, Article 2029. <https://doi.org/10.3389/fpsyg.2015.02029>
- Jamieson, D. G., Kranjc, G., Yu, K., & Hodgetts, W. E. (2004). Speech intelligibility of young school-aged children in the presence of real-life classroom noise. *Journal of the American Academy of Audiology*, 15(07), 508–517. <https://doi.org/10.3766/jaaa.15.7.5>
- Klatte, M., Meis, M., Sukowski, H., & Schick, A. (2007). Effects of irrelevant speech and traffic noise on speech perception and cognitive performance in elementary school children. *Noise and Health*, 9(36), 64–74. <https://doi.org/10.4103/1463-1741.36982>

- Lyberg-Åhlander, V., Haake, M., Brännström, J., Schötz, S., & Sahlén, B. (2015). Does the speaker’s voice quality influence children’s performance on a language comprehension test? *International Journal of Speech-Language Pathology*, 17(1), 63–73. <https://doi.org/10.3109/17549507.2014.898098>
- Lyberg-Åhlander, V., Holm, L., Kastberg, T., Haake, M., Brännström, K. J., & Sahlén, B. (2015). Are children with stronger cognitive capacity more or less disturbed by classroom noise and dysphonic teachers? *International Journal of Speech-Language Pathology*, 17(6), 577–588. <https://doi.org/10.3109/17549507.2015.1024172>
- McCreery, R. W., & Stelmachowicz, P. G. (2013). The effects of limited bandwidth and noise on verbal processing time and word recall in normal-hearing children. *Ear and Hearing*, 34(5), 585–591. <https://doi.org/10.1097/AUD.0b013e31828576e2>
- McGarrigle, R., Dawes, P., Stewart, A. J., Kuchinsky, S. E., & Munro, K. J. (2017). Measuring listening-related effort and fatigue in school-aged children using pupillometry. *Journal of Experimental Child Psychology*, 161, 95–112. <https://doi.org/10.1016/j.jecp.2017.04.006>
- Morsomme, D., Minell, L., & Verduyck, I. (2011). *Impact of teachers’ voice quality on children’s language processing skills* (pp. 9–15). Stem En Stemstoornissen: VOCOLOGIE.
- Morton, V., & Watson, D. R. (2001). The impact of impaired vocal quality on children’s ability to process spoken language. *Logopedics Phoniatrics Vocology*, 26(1), 17–25. <https://doi.org/10.1080/14015430118232>
- Nakeva von Mentzer, C., Sundström, M., Enqvist, K., & Hällgren, M. (2018). Assessing speech perception in Swedish school-aged children: Preliminary data on the Listen-Say test. *Logopedics Phoniatrics Vocology*, 43(3), 106–119. <https://doi.org/10.1080/14015439.2017.1380076>
- Nelson, P., Kohnert, K., Sabur, S., & Shaw, D. (2005). Classroom noise and children learning through a second language. *Language, Speech, and Hearing Services in Schools*, 36(6), 219–229. [https://doi.org/10.1044/0161-1461\(2005/022\)](https://doi.org/10.1044/0161-1461(2005/022))
- Nirme, J., Haake, M., Lyberg-Åhlander, V., Brännström, J., & Sahlén, B. (2019). A virtual speaker in noisy classroom conditions: Supporting or disrupting children’s listening comprehension? *Logopedics Phoniatrics Vocology*, 44(2), 79–86. <https://doi.org/10.1080/14015439.2018.1455894>
- Osman, H., & Sullivan, J. R. (2014). Children’s auditory working memory performance in degraded listening conditions. *Journal of Speech, Language, and Hearing Research*, 57(4), 1503–1511. [https://doi.org/10.1044/2014\\_JSLHR-H-13-0286](https://doi.org/10.1044/2014_JSLHR-H-13-0286)
- Peng, J., & Jiang, P. (2016). Chinese word identification and sentence intelligibility in primary school classrooms. *Archives of Acoustics*, 41(2), 213–219. <https://doi.org/10.1515/aoa-2016-0021>
- Peng, J., Zhang, H., & Yan, N. (2016). Effect of different types of noises on Chinese speech intelligibility of children in elementary school classrooms. *Acta Acustica united with Acustica*, 102(5), 938–944. <https://doi.org/10.3813/AAA.919008>
- Peng, J., & Wu, S. (2018). Chinese speech intelligibility of children in noisy and reverberant environments. *Indoor and Built Environment*, 27(10), 1357–1363. <https://doi.org/10.1177/1420326X17716236>
- Picou, E. M., Bean, B. N., Marcum, S. C., Hornsby, B. W., & Ricketts, T. A. (2019). Moderate reverberation does not increase subjective fatigue, subjective listening effort, or behavioral listening effort in school-aged children. *Frontiers in Psychology*, 10, 1749. <https://doi.org/10.3389/fpsyg.2019.01749>
- Prodi, N., Visentin, C., Borella, E., Mammarella, I. C., & Di Domenico, A. (2019). Noise, age and gender effects on speech intelligibility and sentence comprehension for 11- to 13-year-old children in real classrooms. *Frontiers in Psychology*, 10, 2166. <https://doi.org/10.3389/fpsyg.2019.02166>
- Prodi, N., Visentin, C., Peretti, A., Griguolo, J., & Bartolucci, G. B. (2019). Investigating listening effort in classrooms for 5- to 7-yearold children. *Language, Speech, and Hearing Services in Schools*, 50(2), 196–210. [https://doi.org/10.1044/2018\\_LSHSS-18-0039](https://doi.org/10.1044/2018_LSHSS-18-0039)
- Rogerson, J., & Dodd, B. (2005). Is there an effect of dysphonic teachers’ voices on children’s processing of spoken language? *Journal of Voice*, 19(1), 47–60. <https://doi.org/10.1016/j.jvoice.2004.02.007>
- Sahlén, B., Haake, M., von Lochow, H., Holm, L., Kastberg, T., Brännström, K. J., & Lyberg-Åhlander, V. (2017). Is children’s listening effort in background noise influenced by the speaker’s voice quality? *Logopedics Phoniatrics Vocology*, 43(2), 47–55. <https://doi.org/10.1080/14015439.2017.1324914>

- Sullivan, J. R., Osman, H., & Schafer, E. C. (2015). The effect of noise on the relationship between auditory working memory and comprehension in school-age children. *Journal of Speech, Language, and Hearing Research*, 58(3), 1043–1051. [https://doi.org/10.1044/2015\\_JSLHR-H-14-0204](https://doi.org/10.1044/2015_JSLHR-H-14-0204)
- von Lochow, H., Lyberg-Åhlander, V., Sahlén, B., Kastberg, T., & Brännström, K. J. (2018). The effect of voice quality and competing speakers in a passage comprehension task: Performance in relation to cognitive functioning in children with normal hearing. *Logopedics Phoniatrics Vocology*, 43(1), 11–19. <https://doi.org/10.1080/14015439.2017.1298835>
- Yacullo, W. S., & Hawkins, D. B. (1987). Speech recognition in noise and reverberation by school-age children. *Audiology*, 26(4), 235–246. <https://doi.org/10.3109/00206098709081552>
- Zhang, D., Tenpierik, M., & Bluysen, P. M. (2019). Interaction effect of background sound type and sound pressure level on children of primary schools in the Netherlands. *Applied Acoustics*, 154, 161–169. <https://doi.org/10.1016/j.apacoust.2019.05.007>
